# Supplementary material
Source: MDPI journal article supplement (https://www.mdpi.com/2227-7072/5/4/26)
Supplement: s1 [file s1]

## Supplementary Material

This appendix lists all the variables used to construct the World and country-specific factors. All variables were obtained from globalfinancialdata.com unless otherwise specified. Transformation codes are: 1 = No Transformation, 2 = First Difference, 4 = Logarithm, 5 = First Difference of Logarithms. The following abbreviations appear: SA = Seasonally Adjusted, NSA = Not Seasonally Adjusted, EU = European Union, EA = Euro Area

**Table S1: Variables Employed for World Factors**

| No                                    | Variable Name                                                                                               | Transformation Code |
|---------------------------------------|-------------------------------------------------------------------------------------------------------------|---------------------|
| <b>Real Output and Income Indices</b> |                                                                                                             |                     |
| 1                                     | EU27-Gross Domestic Product (€mn - c.p.) - SA                                                               | 5                   |
| 2                                     | EA-Gross Domestic Product (€mn - c.p.) - SA                                                                 | 5                   |
| 3                                     | UK-Gross Domestic Product (€mn - c.p.) - SA                                                                 | 5                   |
| 4                                     | Mining and quarrying; manufacturing; electricity, gas, steam and air conditioning supply EU27               | 5                   |
| 5                                     | Mining and quarrying; manufacturing; electricity, gas, steam and air conditioning supply EA                 | 5                   |
| 6                                     | Mining and quarrying; manufacturing; electricity, gas, steam and air conditioning supply; construction EU27 | 5                   |
| 7                                     | Mining and quarrying; manufacturing; electricity, gas, steam and air conditioning supply; construction EA   | 5                   |
| 8                                     | Mining and quarrying; manufacturing; electricity, gas, steam and air conditioning supply; construction UK   | 5                   |
| 9                                     | EU Industrials Index                                                                                        | 2                   |
| 10                                    | EU Services Index                                                                                           | 2                   |

|    |                              |   |
|----|------------------------------|---|
| 11 | EU Construction Index        | 2 |
| 12 | EU Retail Index              | 2 |
| 13 | EU Building Index            | 2 |
| 14 | Euro Area Industrials Index  | 2 |
| 15 | Euro Area Services Index     | 2 |
| 16 | Euro Area Construction Index | 2 |
| 17 | Euro Area Retail Index       | 2 |
| 18 | Euro Area Building Index     | 2 |
| 19 | UK Industrials Index         | 2 |
| 20 | UK Services Index            | 2 |
| 21 | UK Construction Index        | 2 |
| 22 | UK Retail Index              | 2 |
| 23 | UK Building Index            | 2 |
|    | <b>Exchange Rate Indices</b> |   |
| 24 | US dollar                    | 5 |
| 25 | Pound sterling               | 5 |
| 26 | Swiss franc                  | 5 |

|                            |                                                                                      |   |
|----------------------------|--------------------------------------------------------------------------------------|---|
| 27                         | Canadian dollar                                                                      | 5 |
| 28                         | Japanese yen                                                                         | 5 |
| 29                         | Russian rouble                                                                       | 5 |
| <b>Price Indices</b>       |                                                                                      |   |
| <hr/>                      |                                                                                      |   |
| 30                         | Consumer Price Index - UK                                                            | 5 |
| 31                         | Europe Harmonised Consumer Price Index                                               | 5 |
| <b>Stock Price Indices</b> |                                                                                      |   |
| <hr/>                      |                                                                                      |   |
| 32                         | FTSE 100 - Price Index                                                               | 5 |
| 33                         | France CAC 40 - Price Index                                                          | 5 |
| 34                         | S&P 500 Composite - Price Index                                                      | 5 |
| 35                         | S&P 100 - Price Index                                                                | 5 |
| 36                         | NYSE Composite - Price Index                                                         | 5 |
| 37                         | Japan, Japanese yen, Nikkei 225 Stock Average Index                                  | 5 |
| 38                         | Europe, Euro, Dow Jones Stoxx 50 Price Index                                         | 5 |
| 39                         | Euro area (changing composition), Euro, Dow Jones Euro Stoxx Price Index             | 5 |
| 40                         | Euro area (changing composition), Euro, Dow Jones Euro Stoxx Basic Materials E Index | 5 |
| 41                         | Euro area (changing composition), Euro, Dow Jones Euro Stoxx Consumer Goods Index    | 5 |

|    |                                                                                         |   |
|----|-----------------------------------------------------------------------------------------|---|
| 42 | Euro area (changing composition), Euro, Dow Jones Euro Stoxx Consumer Services Index    | 5 |
| 43 | Euro area (changing composition), Euro, Dow Jones Euro Stoxx Financials Index           | 5 |
| 44 | Euro area (changing composition), Euro, Dow Jones Euro Stoxx Technology E Index         | 5 |
| 45 | Euro area (changing composition), Euro, Dow Jones Euro Stoxx Healthcare Index (S1ESH1E) | 5 |
| 46 | Euro area (changing composition), Euro, Dow Jones Euro Stoxx Industrials Index          | 5 |
| 47 | Euro area (changing composition), Euro, Dow Jones Euro Stoxx Oil & Gas Energy Index     | 5 |
| 48 | Euro area (changing composition), Euro, Dow Jones Euro Stoxx Telecommunications Index   | 5 |
| 49 | Euro area (changing composition), Euro, Dow Jones Euro Stoxx Utilities E Index          | 5 |
| 50 | United States, US dollar, Standard & Poors 500 Composite Index (S_PCOMP)                | 5 |
| 51 | Dow Jones STOXX 50 (Europe)                                                             | 5 |
| 52 | Dow Jones EURO STOXX 50                                                                 | 5 |
| 53 | Dow Jones STOXX Broad (Europe)                                                          | 5 |
| 54 | Dow Jones EURO STOXX Broad                                                              | 5 |
| 55 | Dow Jones Industrial Average                                                            | 5 |
|    | <b>Interest Rates Indices</b>                                                           |   |
| 56 | UK 10 -year Government Bond Yield                                                       | 2 |
| 57 | Europe 3-month EURIBOR                                                                  | 2 |

|                                |                                                        |   |
|--------------------------------|--------------------------------------------------------|---|
| 58                             | Europe 6-month EURIBOR                                 | 2 |
| 59                             | Europe 12-month EURIBOR                                | 2 |
| 60                             | Moody's Aaa Corporate Yield                            | 2 |
| 61                             | Moody's Baa Corporate Yield                            | 2 |
| 62                             | France 10-year Government Bond Yield                   | 2 |
| 63                             | France 3-month Treasury Bill Yield                     | 2 |
| 64                             | UK 3-month Treasury Bill Yield                         | 2 |
| 65                             | UK 10-year Government Bond Yield                       | 1 |
| 66                             | France 10-year Government Bond Yield                   | 1 |
| 67                             | US Corporate Bond Yield                                | 1 |
| 68                             | SISP10                                                 | 1 |
| 69                             | SIT10                                                  | 1 |
| <b>Commodity Price Indices</b> |                                                        |   |
| <hr/>                          |                                                        |   |
| 70                             | Brent Crude Oil (€)-Commodity Prices                   | 5 |
| 71                             | Gold Bullion Price-New York (€/Ounce) -Commodity Price | 5 |
| 72                             | Silver Cash Price (€/Ounce) -Commodity Prices          | 5 |
| <b>Miscellaneous</b>           |                                                        |   |
| <hr/>                          |                                                        |   |

|    |                                    |   |
|----|------------------------------------|---|
| 73 | EU Economic Sentiment Index        | 2 |
| 74 | Euro Area Economic Sentiment Index | 2 |
| 75 | UK Economic Sentiment Index        | 2 |

**Table S2: Variables Employed for German Domestic Factors**

| No                                    | Variable Name                                                                                                        | Transformation Code |
|---------------------------------------|----------------------------------------------------------------------------------------------------------------------|---------------------|
| <b>Real Output and Income Indices</b> |                                                                                                                      |                     |
| 1                                     | Construction Production Index (Construction)                                                                         | 5                   |
| 2                                     | Industry Production Index (Mining and quarrying; manufacturing; electricity, gas, steam and air conditioning supply) | 5                   |
| 3                                     | Industry Turnover Index (MIG - Capital goods)                                                                        | 5                   |
| 4                                     | Industry Turnover Index (MIG - Consumer goods)                                                                       | 5                   |
| 5                                     | Industry Turnover Index (MIG - Intermediate goods)                                                                   | 5                   |
| 6                                     | Industry Turnover Index (MIG - Energy (except D and E))                                                              | 5                   |
| 7                                     | Industrial Production Index                                                                                          | 5                   |
| 8                                     | Industrial Production Volume SA                                                                                      | 5                   |
| <b>Labour Market Indices</b>          |                                                                                                                      |                     |
| 9                                     | Real Unit Labour Cost Index, NSA                                                                                     | 5                   |
| 10                                    | Industry Labor Input Index (MIG - Capital goods) Employment                                                          | 5                   |
| 11                                    | Industry Labor Input Index (MIG - Consumer goods) Employment                                                         | 5                   |

|    |                                                                                                                                                |   |
|----|------------------------------------------------------------------------------------------------------------------------------------------------|---|
| 12 | Industry Labor Input Index (MIG - Durable consumer goods) Employment                                                                           | 5 |
| 13 | Industry Labor Input Index (MIG - Intermediate goods) Employment                                                                               | 5 |
| 14 | Industry Labor Input Index (MIG - Non-durable consumer goods) Employment                                                                       | 5 |
| 15 | Industry Labor Input Index (MIG - Energy) Employment                                                                                           | 5 |
| 16 | Industry Labor Input Index (MIG - Energy (except D and E)) Employment                                                                          | 5 |
| 17 | Industry Labor Input Index (MIG - Capital goods) Hours Worked                                                                                  | 5 |
| 18 | Industry Labor Input Index (MIG - Consumer goods) Hours Worked                                                                                 | 5 |
| 19 | Industry Labor Input Index (MIG - Durable consumer goods) Hours Worked                                                                         | 5 |
| 20 | Industry Labor Input Index (MIG - Intermediate goods) Hours Worked                                                                             | 5 |
| 21 | Industry Labor Input Index (MIG - Non-durable consumer goods) Hours Worked                                                                     | 5 |
| 22 | Industry Labor Input Index (MIG - Energy) Hours Worked                                                                                         | 5 |
| 23 | Industry Labor Input Index (MIG - Energy (except D and E)) Hours Worked                                                                        | 5 |
| 24 | Industry Labor Input Index (Mining and quarrying; manufacturing; electricity, gas, steam and air conditioning supply) Gross Wages and Salaries | 5 |
| 25 | Industry Labor Input Index (Industry (except construction), sewerage, waste management and remediation activities) Gross Wages and Salaries    | 5 |
| 26 | Industry Labor Input Index (MIG - Capital goods) Gross Wages and Salaries                                                                      | 5 |
| 27 | Industry Labor Input Index (MIG - Consumer goods) Gross Wages and Salaries                                                                     | 5 |



|    |                                                                                        |   |
|----|----------------------------------------------------------------------------------------|---|
| 28 | Industry Labor Input Index (MIG - Durable consumer goods) Gross Wages and Salaries     | 5 |
| 29 | Industry Labor Input Index (MIG - Intermediate goods) Gross Wages and Salaries         | 5 |
| 30 | Industry Labor Input Index (MIG - Non-durable consumer goods) Gross Wages and Salaries | 5 |
| 31 | Industry Labor Input Index (MIG - Energy) Gross Wages and Salaries                     | 5 |
| 32 | Industry Labor Input Index (MIG - Energy (except D and E)) Gross Wages and Salaries    | 5 |
| 33 | Real Labour Productivity Per Person Employed Index, NSA                                | 5 |
| 34 | Unemployment Rate Total From 25 to 74 years (SA)                                       | 2 |
| 35 | Gross wages and salaries (Millions of national currency NSA) Total                     | 5 |

#### **Price Indices**

---

|    |                                                                                                                                                            |   |
|----|------------------------------------------------------------------------------------------------------------------------------------------------------------|---|
| 36 | Industry Producer Prices Index (Mining and quarrying; manufacturing; electricity, gas, steam and air conditioning supply)                                  | 5 |
| 37 | Industry Producer Prices Index (Industry (except construction), sewerage, waste management and remediation activities)                                     | 5 |
| 38 | Industry Producer Prices Index (Industry (except construction, sewerage, waste management and remediation activities), except food, beverages and tobacco) | 5 |
| 39 | Industry Producer Prices Index (MIG - Consumer goods)                                                                                                      | 5 |
| 40 | Industry Producer Prices Index (MIG - Durable consumer goods)                                                                                              | 5 |
| 41 | Industry Producer Prices Index (MIG - Intermediate goods)                                                                                                  | 5 |
| 42 | Industry Producer Prices Index (MIG - Intermediate and capital goods)                                                                                      | 5 |

|                               |                                                                                                               |   |
|-------------------------------|---------------------------------------------------------------------------------------------------------------|---|
| 43                            | Industry Producer Prices Index (MIG - Energy)                                                                 | 5 |
| 44                            | Industry Producer Prices Index (MIG - Energy (except D and E))                                                | 5 |
| 45                            | Industry Producer Prices Index (MIG - Consumer goods)                                                         | 5 |
| 46                            | Export Price Index                                                                                            | 5 |
| 47                            | Import Price Index                                                                                            | 5 |
| <b>Stock Market Indices</b>   |                                                                                                               |   |
| <hr/>                         |                                                                                                               |   |
| 48                            | CDAX Banks Price Index                                                                                        | 5 |
| 49                            | Dow Jones Stock Index                                                                                         | 5 |
| <b>Banking Sector Indices</b> |                                                                                                               |   |
| <hr/>                         |                                                                                                               |   |
| 50                            | Deposits with agreed maturity up to 2 years (Millions of euro NSA)                                            | 5 |
| 51                            | Deposits redeemable at notice up to 3 months (Millions of euro NSA)                                           | 5 |
| 52                            | Total deposits of residents held at monetary financial institutions (non-consolidated) (Millions of euro NSA) | 5 |
| 53                            | Central government deposits held at monetary financial institutions (Millions of euro NSA)                    | 5 |
| 54                            | Deposits of monetary financial institutions held at monetary financial institutions (Millions of euro NSA)    | 5 |
| 55                            | Deposits of other residents held at monetary financial institutions (Millions of euro NSA)                    | 5 |
| 56                            | Total deposits of residents held at monetary financial institutions (consolidated) (Millions of euro NSA)     | 5 |
| 57                            | Loans to total residents granted by monetary financial institutions (non-consolidated) (Millions of euro NSA) | 5 |

|    |                                                                                                                            |   |
|----|----------------------------------------------------------------------------------------------------------------------------|---|
| 58 | Loans to general government granted by monetary financial institutions (Millions of euro NSA)                              | 5 |
| 59 | Loans to monetary financial institutions granted by monetary financial institutions (Millions of euro NSA)                 | 5 |
| 60 | Loans to other residents granted by monetary financial institutions (Millions of euro NSA)                                 | 5 |
| 61 | Loans to total residents granted by monetary financial institutions (consolidated) (Millions of euro NSA)                  | 5 |
| 62 | Overnight deposits (Millions of euro NSA)                                                                                  | 5 |
| 63 | Deposits with agreed maturity up to 2 years (Millions of national currency NSA)                                            | 5 |
| 64 | Deposits redeemable at notice up to 3 months (Millions of national currency NSA)                                           | 5 |
| 65 | Total deposits of residents held at monetary financial institutions (non-consolidated) (Millions of national currency NSA) | 5 |
| 66 | Overnight deposits (Millions of national currency NSA)                                                                     | 5 |
| 67 | Business Loans to 1 Year                                                                                                   | 5 |
| 68 | Money market paper and debt securities up to 2 years (Millions of euro NSA)                                                | 5 |
| 69 | Money market funds shares/units (Millions of euro NSA)                                                                     | 5 |
| 70 | Money market paper and debt securities up to 2 years (Millions of national currency NSA)                                   | 5 |
| 71 | Money market funds shares/units (Millions of national currency NSA)                                                        | 5 |
|    | <b>External Sector</b>                                                                                                     |   |
| 73 | Quarterly Exports Of Goods (Current Prices, Millions Of National Currency, Not Seasonally Adjusted Data)                   | 5 |

|                      |                                                                                                                                            |   |
|----------------------|--------------------------------------------------------------------------------------------------------------------------------------------|---|
| 74                   | Quarterly Exports Of Services (Current Prices, Millions Of National Currency, Not Seasonally Adjusted Data)                                | 5 |
| 75                   | Quarterly Imports Of Goods (Current Prices, Millions Of National Currency At Prices Of The Previous Year, Not Seasonally Adjusted Data)    | 5 |
| 76                   | Quarterly Imports Of Services (Current Prices, Millions Of National Currency At Prices Of The Previous Year, Not Seasonally Adjusted Data) | 5 |
| 77                   | Net Current Account (Millions Of Euro, Quarterly)                                                                                          | 2 |
| 78                   | Imports of goods and services (Millions of national currency NSA)                                                                          | 5 |
| <b>Miscellaneous</b> |                                                                                                                                            |   |
| 79                   | Consumer Confidence Index                                                                                                                  | 5 |
| 80                   | Gross capital formation (Millions of national currency SA)                                                                                 | 5 |
| 81                   | Household and NPISH final consumption expenditure (Millions of national currency NSA)                                                      | 5 |
| 82                   | 3-5 Year Government Bond Yield                                                                                                             | 2 |

**Table S3: Variables Employed for Italy Domestic Factors**

| No                                    | Variable Name                                                                                                        | Transformation Code |
|---------------------------------------|----------------------------------------------------------------------------------------------------------------------|---------------------|
| <b>Real Output and Income Indices</b> |                                                                                                                      |                     |
| 1                                     | Industry Production Index (Mining and quarrying; manufacturing; electricity, gas, steam and air conditioning supply) | 5                   |
| 2                                     | Industry Turnover Index (MIG - Capital goods)                                                                        | 5                   |
| 3                                     | Industry Turnover Index (MIG - Consumer goods)                                                                       | 5                   |
| 4                                     | Industry Turnover Index (MIG - Intermediate goods)                                                                   | 5                   |
| 5                                     | Industry Turnover Index (MIG - Intermediate and capital goods)                                                       | 5                   |
| 6                                     | Industry Turnover Index (MIG - Energy (except D and E))                                                              | 5                   |
| 7                                     | Industrial Production Index SA                                                                                       | 5                   |
| 8                                     | Industrial Production Volume SA                                                                                      | 5                   |
| <b>Labour Market Indices</b>          |                                                                                                                      |                     |
| 9                                     | Nominal Unit Labour Cost Index, NSA                                                                                  | 5                   |
| 10                                    | Real Unit Labour Cost Index, NSA                                                                                     | 5                   |
| 11                                    | Real Labour Productivity Per Person Employed Index, NSA                                                              | 5                   |
| 12                                    | Unemployment Rate Total Less than 25 years (NSA)                                                                     | 2                   |

|                             |                                                                         |   |
|-----------------------------|-------------------------------------------------------------------------|---|
| 13                          | Unemployment Long-term unemployment in % of active population (Females) | 2 |
| 14                          | Unemployment Very long-term unemployment in % active population (Males) | 2 |
| 15                          | Unemployment Long-term unemployment in % of active population (Total)   | 2 |
| 16                          | Unemployment Females From 25 to 74 years (NSA)                          | 5 |
| 17                          | Unemployment Total Less than 25 years (NSA, no of persons)              | 5 |
| 18                          | Unemployment Rate Females Less than 25 years (SA)                       | 2 |
| <b>Price Indices</b>        |                                                                         |   |
| <hr/>                       |                                                                         |   |
| 19                          | Harmonized Consumer Price Index                                         | 5 |
| 20                          | Export Price Index                                                      | 5 |
| 21                          | Import Price Index                                                      | 5 |
| <b>Stock Market Indices</b> |                                                                         |   |
| <hr/>                       |                                                                         |   |
| 22                          | FTSE Italia All-Share Chemicals Index                                   | 5 |
| 23                          | FTSE Italia All-Share Industrials Index                                 | 5 |
| 24                          | FTSE Italia All-Share Construction and Materials Index                  | 5 |
| 25                          | FTSE Italia All-Share Automobiles and Parts Index                       | 5 |
| 26                          | FTSE Italia All-Share Consumer Services Index                           | 5 |
| 27                          | FTSE Italia All-Share Retail Index                                      | 5 |

|                               |                                                                                                               |   |
|-------------------------------|---------------------------------------------------------------------------------------------------------------|---|
| 28                            | FTSE Italia All-Share Media Index                                                                             | 5 |
| 29                            | FTSE Italia All-Share Utilities Index                                                                         | 5 |
| 30                            | FTSE Italia All-Share Financial Index                                                                         | 5 |
| 31                            | FTSE Italia All-Share Banks Index                                                                             | 5 |
| 32                            | FTSE Italia All-Share Midcap Index                                                                            | 5 |
| 33                            | Dow Jones Stock Index                                                                                         | 5 |
| <b>Banking Sector Indices</b> |                                                                                                               |   |
| 34                            | Total deposits of residents held at monetary financial institutions (non-consolidated) (Millions of euro NSA) | 5 |
| 35                            | Central government deposits held at monetary financial institutions (Millions of euro NSA)                    | 5 |
| 36                            | Loans to total residents granted by monetary financial institutions (non-consolidated) (Millions of euro NSA) | 5 |
| 37                            | Deposits of monetary financial institutions held at monetary financial institutions (Millions of euro NSA)    | 5 |
| 38                            | Deposits of other residents held at monetary financial institutions (Millions of euro NSA)                    | 5 |
| 39                            | Total deposits of residents held at monetary financial institutions (consolidated) (Millions of euro NSA)     | 5 |
| 40                            | Loans to general government granted by monetary financial institutions (Millions of euro NSA)                 | 5 |
| 41                            | Loans to monetary financial institutions granted by monetary financial institutions (Millions of euro NSA)    | 5 |
| 42                            | Loans to other residents granted by monetary financial institutions (Millions of euro NSA)                    | 5 |
| 43                            | Loans to total residents granted by monetary financial institutions (consolidated) (Millions of euro NSA)     | 5 |

|    |                                                                                          |   |
|----|------------------------------------------------------------------------------------------|---|
| 44 | Overnight deposits (Millions of euro NSA)                                                | 5 |
| 45 | Deposits with agreed maturity up to 2 years (Millions of national currency NSA)          | 5 |
| 46 | Deposits redeemable at notice up to 3 months (Millions of national currency NSA)         | 5 |
| 47 | General Government, Currency And Deposits Millions Of National Currency                  | 5 |
| 48 | Central Government, Currency And Deposits Millions Of National Currency                  | 5 |
| 49 | General government Transferable deposits; other deposits (Millions of national currency) | 5 |
| 50 | General government Loans (Millions of national currency)                                 | 5 |
| 51 | Central government Loans (Millions of national currency)                                 | 5 |
| 52 | Local government Loans (Millions of national currency)                                   | 5 |
| 53 | Social security funds Loans (Millions of national currency)                              | 5 |
| 54 | General government Short-term - Loans (Millions of national currency)                    | 5 |
| 55 | Central government Short-term - Loans (Millions of national currency)                    | 5 |
| 56 | Local government Short-term - Loans (Millions of national currency)                      | 5 |
| 57 | Social security funds Short-term - Loans (Millions of national currency)                 | 5 |
| 58 | General government Long-term - Loans (Millions of national currency)                     | 5 |
| 59 | Central government Long-term - Loans (Millions of national currency)                     | 5 |
| 60 | Local government Long-term - Loans (Millions of national currency)                       | 5 |



61 Social security funds Long-term - Loans (Millions of national currency) 5

**External Sector**

---

62 Quarterly Exports Of Goods (Current Prices, Millions Of National Currency, Not Seasonally Adjusted Data) 5

63 Quarterly Exports Of Services (Current Prices, Millions Of National Currency, Not Seasonally Adjusted Data) 5

64 Quarterly Imports Of Goods (Current Prices, Millions Of National Currency At Prices Of The Previous Year, Not Seasonally Adjusted Data) 5

65 Quarterly Imports Of Services (Current Prices, Millions Of National Currency At Prices Of The Previous Year, Not Seasonally Adjusted Data) 5

66 Net Current Account (Millions Of Euro, Quarterly) 2

67 Real Effective Exchange Rate (deflator: consumer price indices - 16 trading partners - Euro Area) 2

**Miscellaneous**

---

68 Consumer Confidence Index 5

69 Gross capital formation (Millions of national currency SA) 5

70 Household and NPISH final consumption expenditure (Millions of national currency NSA) 5

71 Energy Supply: Total imports (Natural Gas) (Terajoules (Gross calorific value = GCV)) 5

72 1-year Government Note Yield 2

73 30-Year Government Bond Yield 2

74 3-year Government Notes Yield 2

75 5-Year Government Note Yield 2

|    |                                                                                            |   |
|----|--------------------------------------------------------------------------------------------|---|
| 76 | Variable Rate Coupon Government Bond Yield                                                 | 2 |
| 77 | Zero Coupon Government Bond Yield                                                          | 2 |
| 78 | Average Corporate Bond Yield                                                               | 2 |
| 79 | Energy Supply: Primary production (Natural Gas) (Terajoules (Gross calorific value = GCV)) | 5 |
| 80 | Gross consumption Electrical Energy                                                        | 5 |
| 81 | Total gross electricity generation Electrical Energy                                       | 5 |
| 82 | 3-month Treasury Bill Yield                                                                | 2 |
| 83 | 6-month Treasury Bill Yield                                                                | 2 |
| 84 | Government Revenue Total (Source: Thomson Datastream)                                      | 5 |

**Table S4: Variables Employed for Netherlands Domestic Factors**

| No                                    | Variable Name                                                             | Transformation Code |
|---------------------------------------|---------------------------------------------------------------------------|---------------------|
| <b>Real Output and Income Indices</b> |                                                                           |                     |
| 1                                     | Industry Turnover Index (MIG - Capital goods)                             | 5                   |
| 2                                     | Industry Turnover Index (MIG - Consumer goods)                            | 5                   |
| 3                                     | Industry Turnover Index (MIG - Intermediate goods)                        | 5                   |
| 4                                     | Industry Turnover Index (MIG - Intermediate and capital goods)            | 5                   |
| 5                                     | Industrial Production Index                                               | 5                   |
| 6                                     | Industrial Production Volume SA                                           | 5                   |
| <b>Labour Market Indices</b>          |                                                                           |                     |
| 7                                     | Nominal Unit Labour Cost Index, NSA                                       | 5                   |
| 8                                     | Real Unit Labour Cost Index, NSA                                          | 5                   |
| 9                                     | Real Labour Productivity Per Person Employed Index, NSA                   | 5                   |
| 10                                    | Total Employment - Domestic Concept 1000 Persons, Not Seasonally Adjusted | 5                   |
| 11                                    | Total Employment - National Concept 1000 Persons, Not Seasonally Adjusted | 5                   |
| 12                                    | Unemployment Rate Females Total (SA)                                      | 2                   |

|    |                                                  |   |
|----|--------------------------------------------------|---|
| 13 | Agriculture in % of total employment (Total)     | 5 |
| 14 | Unemployment Rate Total From 25 to 74 years (SA) | 2 |
| 15 | Unemployment on population aged 15-24 (Total)    | 5 |

**Price Indices**

---

|    |                                                                                                                           |   |
|----|---------------------------------------------------------------------------------------------------------------------------|---|
| 16 | Export Price Index                                                                                                        | 5 |
| 17 | Import Price Index                                                                                                        | 5 |
| 18 | Industry Import Prices Index (Mining and quarrying; manufacturing; electricity, gas, steam and air conditioning supply)   | 5 |
| 19 | Industry Import Prices Index (MIG - Capital goods)                                                                        | 5 |
| 20 | Industry Import Prices Index (MIG - Consumer goods)                                                                       | 5 |
| 21 | Industry Import Prices Index (MIG - Durable consumer goods)                                                               | 5 |
| 22 | Industry Import Prices Index (MIG - Intermediate goods)                                                                   | 5 |
| 23 | Industry Import Prices Index (MIG - Intermediate and capital goods)                                                       | 5 |
| 24 | Industry Import Prices Index (MIG - Non-durable consumer goods)                                                           | 5 |
| 25 | Industry Producer Prices Index (Mining and quarrying; manufacturing; electricity, gas, steam and air conditioning supply) | 5 |
| 26 | Industry Producer Prices Index (Industry (except construction), sewerage, waste management and remediation activities)    | 5 |

|                               |                                                                                                                                                            |   |
|-------------------------------|------------------------------------------------------------------------------------------------------------------------------------------------------------|---|
| 27                            | Industry Producer Prices Index (Industry (except construction, sewerage, waste management and remediation activities), except food, beverages and tobacco) | 5 |
| 28                            | Industry Producer Prices Index (MIG - Capital goods)                                                                                                       | 5 |
| 29                            | Industry Producer Prices Index (MIG - Consumer goods)                                                                                                      | 5 |
| 30                            | Industry Producer Prices Index (MIG - Durable consumer goods)                                                                                              | 5 |
| 31                            | Industry Producer Prices Index (MIG - Intermediate goods)                                                                                                  | 5 |
| 32                            | Industry Producer Prices Index (MIG - Intermediate and capital goods)                                                                                      | 5 |
| 33                            | Industry Producer Prices Index (MIG - Non-durable consumer goods)                                                                                          | 5 |
| 34                            | Harmonized Consumer Price Index                                                                                                                            | 5 |
| <b>Stock Market Indices</b>   |                                                                                                                                                            |   |
| <hr/>                         |                                                                                                                                                            |   |
| 35                            | Amsterdam AEX Stock Index                                                                                                                                  | 5 |
| <b>Banking Sector Indices</b> |                                                                                                                                                            |   |
| <hr/>                         |                                                                                                                                                            |   |
| 36                            | Mortgage Loans                                                                                                                                             | 5 |
| 37                            | Deposits with agreed maturity up to 2 years (Millions of euro NSA)                                                                                         | 5 |
| 38                            | Total deposits of residents held at monetary financial institutions (non-consolidated) (Millions of euro NSA)                                              | 5 |
| 39                            | Central government deposits held at monetary financial institutions (Millions of euro NSA)                                                                 | 5 |
| 40                            | Deposits of monetary financial institutions held at monetary financial institutions (Millions of euro NSA)                                                 | 5 |

|    |                                                                                                               |   |
|----|---------------------------------------------------------------------------------------------------------------|---|
| 41 | Deposits of other residents held at monetary financial institutions (Millions of euro NSA)                    | 5 |
| 42 | Total deposits of residents held at monetary financial institutions (consolidated) (Millions of euro NSA)     | 5 |
| 43 | Loans to total residents granted by monetary financial institutions (non-consolidated) (Millions of euro NSA) | 5 |
| 44 | Loans to general government granted by monetary financial institutions (Millions of euro NSA)                 | 5 |
| 45 | Loans to monetary financial institutions granted by monetary financial institutions (Millions of euro NSA)    | 5 |
| 46 | Loans to other residents granted by monetary financial institutions (Millions of euro NSA)                    | 5 |
| 47 | Loans to total residents granted by monetary financial institutions (consolidated) (Millions of euro NSA)     | 5 |
| 48 | Overnight deposits (Millions of euro NSA)                                                                     | 5 |
| 49 | Money market paper and debt securities up to 2 years (Millions of euro NSA)                                   | 5 |
| 50 | Deposits redeemable at notice up to 3 months (Millions of national currency NSA)                              | 5 |

---

**External Sector Indices**

|    |                                                                                                                       |   |
|----|-----------------------------------------------------------------------------------------------------------------------|---|
| 51 | Quarterly Exports Of Goods And Services (Current Prices, Millions Of National Currency, Not Seasonally Adjusted Data) | 5 |
| 52 | Quarterly Exports Of Goods (Current Prices, Millions Of National Currency, Not Seasonally Adjusted Data)              | 5 |
| 53 | Quarterly Exports Of Services (Current Prices, Millions Of National Currency, Not Seasonally Adjusted Data)           | 5 |
| 54 | Quarterly Imports Of Goods And Services (Current Prices, Millions Of National Currency, Not Seasonally Adjusted Data) | 5 |
| 55 | Quarterly Imports Of Goods (Current Prices, Millions Of National Currency, Not Seasonally Adjusted Data)              | 5 |

|    |                                                                                                             |   |
|----|-------------------------------------------------------------------------------------------------------------|---|
| 56 | Quarterly Imports Of Services (Current Prices, Millions Of National Currency, Not Seasonally Adjusted Data) | 5 |
| 57 | Net Current Account (Millions Of Euro, Quarterly)                                                           | 5 |
| 58 | Reserve Position In The IMF Millions Of Euro                                                                | 5 |
|    | <b>Miscellaneous</b>                                                                                        |   |
| 59 | 10-year Government Bond Return Index                                                                        | 5 |
| 60 | Consumer Confidence Index                                                                                   | 5 |
| 61 | Dow Jones Stock Index                                                                                       | 5 |
| 62 | Gross capital formation (Millions of national currency SA)                                                  | 5 |
| 63 | Household and NPISH final consumption expenditure (Millions of national currency NSA)                       | 5 |
| 64 | Energy Supply: Total imports (Natural Gas) (Terajoules (Gross calorific value = GCV))                       | 5 |
| 65 | 3-year Government Bond Yield                                                                                | 2 |
| 66 | 5-year Government Note Yield                                                                                | 2 |
| 67 | 3-month Treasury Bill Yield                                                                                 | 5 |
| 68 | Total Reserves Excluding Gold Millions Of National Currency                                                 | 5 |
| 69 | Total Reserves Including Gold Millions Of National Currency                                                 | 5 |
| 70 | Total Government Revenues (Source: Thomson Datastream)                                                      | 5 |

**Table S5: Variables Employed for Portugal Domestic Factors**

| No                                    | Variable Name                                                                                                                    | Transformation Code |
|---------------------------------------|----------------------------------------------------------------------------------------------------------------------------------|---------------------|
| <b>Real Output and Income Indices</b> |                                                                                                                                  |                     |
| 1                                     | Industry Production Index (Mining and quarrying; manufacturing; electricity, gas, steam and air conditioning supply)             | 5                   |
| 2                                     | Industry Turnover Index (MIG - Capital goods)                                                                                    | 5                   |
| 3                                     | Industry Turnover Index (MIG - Consumer goods)                                                                                   | 5                   |
| 4                                     | Industry Turnover Index (MIG - Intermediate goods)                                                                               | 5                   |
| 5                                     | Industry Turnover Index (MIG - Intermediate and capital goods)                                                                   | 5                   |
| 6                                     | Industry Turnover Index (MIG - Energy (except D and E))                                                                          | 5                   |
| 7                                     | Industrial Production Volume SA                                                                                                  | 5                   |
| 8                                     | Industrial Production Index                                                                                                      | 5                   |
| <b>Labour Market Indices</b>          |                                                                                                                                  |                     |
| 9                                     | Industry Labor Input Index (Mining and quarrying; manufacturing; electricity, gas, steam and air conditioning supply) Employment | 5                   |
| 10                                    | Industry Labor Input Index (Industry (except construction), sewerage, waste management and remediation activities) Employment    | 5                   |
| 11                                    | Industry Labor Input Index (Industry and construction (except sewerage, waste management and remediation activities)) Employment | 5                   |



|    |                                                                                                                                    |   |
|----|------------------------------------------------------------------------------------------------------------------------------------|---|
| 12 | Industry Labor Input Index (MIG - Capital goods) Employment                                                                        | 5 |
| 13 | Industry Labor Input Index (MIG - Consumer goods) Employment                                                                       | 5 |
| 14 | Industry Labor Input Index (MIG - Durable consumer goods) Employment                                                               | 5 |
| 15 | Industry Labor Input Index (MIG - Intermediate goods) Employment                                                                   | 5 |
| 16 | Industry Labor Input Index (MIG - Non-durable consumer goods) Employment                                                           | 5 |
| 17 | Industry Labor Input Index (MIG - Energy) Employment                                                                               | 5 |
| 18 | Industry Labor Input Index (MIG - Energy (except D and E)) Employment                                                              | 5 |
| 19 | Industry Labor Input Index (Mining and quarrying; manufacturing; electricity, gas, steam and air conditioning supply) Hours Worked | 5 |
| 20 | Industry Labor Input Index (Industry (except construction), sewerage, waste management and remediation activities) Hours Worked    | 5 |
| 21 | Industry Labor Input Index (Industry and construction (except sewerage, waste management and remediation activities)) Hours Worked | 5 |
| 22 | Industry Labor Input Index (MIG - Capital goods) Hours Worked                                                                      | 5 |
| 23 | Industry Labor Input Index (MIG - Consumer goods) Hours Worked                                                                     | 5 |
| 24 | Industry Labor Input Index (MIG - Durable consumer goods) Hours Worked                                                             | 5 |
| 25 | Industry Labor Input Index (MIG - Intermediate goods) Hours Worked                                                                 | 5 |
| 26 | Industry Labor Input Index (MIG - Non-durable consumer goods) Hours Worked                                                         | 5 |
| 27 | Industry Labor Input Index (MIG - Energy) Hours Worked                                                                             | 5 |

|    |                                                                                                                                                |   |
|----|------------------------------------------------------------------------------------------------------------------------------------------------|---|
| 28 | Industry Labor Input Index (MIG - Energy (except D and E)) Hours Worked                                                                        | 5 |
| 29 | Industry Labor Input Index (Mining and quarrying; manufacturing; electricity, gas, steam and air conditioning supply) Gross Wages and Salaries | 5 |
| 30 | Industry Labor Input Index (Industry (except construction), sewerage, waste management and remediation activities) Gross Wages and Salaries    | 5 |
| 31 | Industry Labor Input Index (Industry and construction (except sewerage, waste management and remediation activities)) Gross Wages and Salaries | 5 |
| 32 | Industry Labor Input Index (MIG - Capital goods) Gross Wages and Salaries                                                                      | 5 |
| 33 | Industry Labor Input Index (MIG - Consumer goods) Gross Wages and Salaries                                                                     | 5 |
| 34 | Industry Labor Input Index (MIG - Durable consumer goods) Gross Wages and Salaries                                                             | 5 |
| 35 | Industry Labor Input Index (MIG - Intermediate goods) Gross Wages and Salaries                                                                 | 5 |
| 36 | Industry Labor Input Index (MIG - Non-durable consumer goods) Gross Wages and Salaries                                                         | 5 |
| 37 | Industry Labor Input Index (MIG - Energy) Gross Wages and Salaries                                                                             | 5 |
| 38 | Industry Labor Input Index (MIG - Energy (except D and E)) Gross Wages and Salaries                                                            | 5 |
| 39 | Wholesale Price Index                                                                                                                          | 5 |
| 40 | Real labour productivity per person employed (NSA)                                                                                             | 5 |
| 41 | Nominal unit labour cost (NSA)                                                                                                                 | 5 |
| 42 | Unemployment Rate Total From 25 to 74 years (SA)                                                                                               | 2 |

**Price Indices**

---

|    |                                 |   |
|----|---------------------------------|---|
| 43 | Harmonized Consumer Price Index | 5 |
| 44 | Export Price Index              | 5 |
| 45 | Import Price Index              | 5 |

**Stock Market Indices**

---

|    |                                      |   |
|----|--------------------------------------|---|
| 46 | 10-year Government Bond Return Index | 5 |
| 47 | Dow Jones Stock Index                | 5 |

**Banking Sector Indices**

---

|    |                                                                                                               |   |
|----|---------------------------------------------------------------------------------------------------------------|---|
| 48 | Business Loans                                                                                                | 5 |
| 49 | Mortgage Loans                                                                                                | 5 |
| 50 | Deposits with agreed maturity up to 2 years (Millions of euro NSA)                                            | 5 |
| 51 | Total deposits of residents held at monetary financial institutions (non-consolidated) (Millions of euro NSA) | 5 |
| 52 | Central government deposits held at monetary financial institutions (Millions of euro NSA)                    | 5 |
| 53 | Deposits of monetary financial institutions held at monetary financial institutions (Millions of euro NSA)    | 5 |
| 54 | Deposits of other residents held at monetary financial institutions (Millions of euro NSA)                    | 5 |
| 55 | Total deposits of residents held at monetary financial institutions (consolidated) (Millions of euro NSA)     | 5 |
| 56 | Loans to total residents granted by monetary financial institutions (non-consolidated) (Millions of euro NSA) | 5 |

|                                |                                                                                                                       |   |
|--------------------------------|-----------------------------------------------------------------------------------------------------------------------|---|
| 57                             | Loans to general government granted by monetary financial institutions (Millions of euro NSA)                         | 5 |
| 58                             | Loans to monetary financial institutions granted by monetary financial institutions (Millions of euro NSA)            | 5 |
| 59                             | Loans to other residents granted by monetary financial institutions (Millions of euro NSA)                            | 5 |
| 60                             | Loans to total residents granted by monetary financial institutions (consolidated) (Millions of euro NSA)             | 5 |
| 61                             | Overnight deposits (Millions of euro NSA)                                                                             | 5 |
| 62                             | Money market paper and debt securities up to 2 years (Millions of national currency NSA)                              | 5 |
| <b>External Sector Indices</b> |                                                                                                                       |   |
| <hr/>                          |                                                                                                                       |   |
| 63                             | Quarterly Exports Of Goods And Services (Current Prices, Millions Of National Currency, Not Seasonally Adjusted Data) | 5 |
| 64                             | Quarterly Exports Of Goods (Current Prices, Millions Of National Currency, Not Seasonally Adjusted Data)              | 5 |
| 65                             | Quarterly Exports Of Services (Current Prices, Millions Of National Currency, Not Seasonally Adjusted Data)           | 5 |
| 66                             | Total imports Natural Gas                                                                                             | 5 |
| 67                             | Quarterly Imports Of Goods And Services (Current Prices, Millions Of National Currency, Not Seasonally Adjusted Data) | 5 |
| 68                             | Quarterly Imports Of Goods (Current Prices, Millions Of National Currency, Not Seasonally Adjusted Data)              | 5 |
| 69                             | Quarterly Imports Of Services (Current Prices, Millions Of National Currency, Not Seasonally Adjusted Data)           | 5 |
| 70                             | Net Current Account (Millions Of Euro, Quarterly)                                                                     | 2 |
| 71                             | Reserve Position In The IMF Millions Of Euro                                                                          | 5 |

## Miscellaneous

---

|    |                                                                                       |   |
|----|---------------------------------------------------------------------------------------|---|
| 72 | Consumer Confidence Indicator                                                         | 5 |
| 73 | Gross capital formation (Millions of national currency SA)                            | 5 |
| 74 | Household and NPISH final consumption expenditure (Millions of national currency NSA) | 5 |
| 75 | 3-year Government Bond Yield                                                          | 2 |
| 76 | 1-year Government Note Yield                                                          | 2 |
| 77 | 5-year Government Note Yield                                                          | 2 |
| 78 | 3-month Treasury Bill Yield                                                           | 2 |
| 79 | Total Reserves Excluding Gold Millions Of National Currency                           | 5 |
| 80 | Total Reserves Including Gold Millions Of National Currency                           | 5 |
| 81 | Government Revenue Total (Source: Thomson Datastream)                                 | 5 |

**Table S6: Variables Employed for Spain Domestic Factors**

| No                                    | Variable Name                                                                                                        | Transformation Code |
|---------------------------------------|----------------------------------------------------------------------------------------------------------------------|---------------------|
| <b>Real Output and Income Indices</b> |                                                                                                                      |                     |
| 1                                     | Industry Production Index (Mining and quarrying; manufacturing; electricity, gas, steam and air conditioning supply) | 5                   |
| 2                                     | Industrial Production Index                                                                                          | 5                   |
| 3                                     | Industrial Production Volume SA                                                                                      | 5                   |
| <b>Labour Market Indices</b>          |                                                                                                                      |                     |
| 4                                     | Nominal Unit Labour Cost Index, NSA                                                                                  | 5                   |
| 5                                     | Real Unit Labour Cost Index, NSA                                                                                     | 5                   |
| 6                                     | Gross wages and salaries (Millions of national currency NSA) Total                                                   | 5                   |
| 7                                     | Real Labour Productivity Per Person Employed Index, NSA                                                              | 5                   |
| 8                                     | Unemployment Rate Total From 25 to 74 years (SA)                                                                     | 2                   |
| 9                                     | Employment rate (25 to 54 years) (Total)                                                                             | 2                   |
| 10                                    | Agriculture in % of total employment (Total)                                                                         | 2                   |
| 11                                    | Total employment (domestic concept - ESA) (Total)                                                                    | 5                   |
| 12                                    | Unemployment Long-term unemployment in % of unemployment (Males)                                                     | 2                   |

|                               |                                                                                                               |   |
|-------------------------------|---------------------------------------------------------------------------------------------------------------|---|
| 13                            | Unemployment Very long-term unemployment in % active population (Males)                                       | 2 |
| 14                            | Unemployment Total Less than 25 years (NSA)                                                                   | 5 |
| 15                            | Unemployment Rate Females Total (SA)                                                                          | 2 |
| 16                            | Unemployment Rate                                                                                             | 2 |
| <b>Price Indices</b>          |                                                                                                               |   |
| <hr/>                         |                                                                                                               |   |
| 17                            | Export Price Index                                                                                            | 5 |
| 18                            | Import Price Index                                                                                            | 5 |
| 19                            | Spain Consumer Price Index: Energy                                                                            | 5 |
| <b>Stock Market Indices</b>   |                                                                                                               |   |
| <hr/>                         |                                                                                                               |   |
| 20                            | 10-year Government Bond Total Return Index                                                                    | 5 |
| 21                            | Dow Jones Stock Index                                                                                         | 5 |
| 22                            | Madrid SE General Index                                                                                       | 5 |
| 23                            | Barcelona SE-30 Return Index                                                                                  | 5 |
| 24                            | Valencia SE General Index                                                                                     | 5 |
| <b>Banking Sector Indices</b> |                                                                                                               |   |
| <hr/>                         |                                                                                                               |   |
| 25                            | Deposits with agreed maturity up to 2 years (Millions of euro NSA)                                            | 5 |
| 26                            | Total deposits of residents held at monetary financial institutions (non-consolidated) (Millions of euro NSA) | 5 |

|    |                                                                                                               |   |
|----|---------------------------------------------------------------------------------------------------------------|---|
| 27 | Central government deposits held at monetary financial institutions (Millions of euro NSA)                    | 5 |
| 28 | Deposits of monetary financial institutions held at monetary financial institutions (Millions of euro NSA)    | 5 |
| 29 | Deposits of other residents held at monetary financial institutions (Millions of euro NSA)                    | 5 |
| 30 | Total deposits of residents held at monetary financial institutions (consolidated) (Millions of euro NSA)     | 5 |
| 31 | Loans to total residents granted by monetary financial institutions (non-consolidated) (Millions of euro NSA) | 5 |
| 32 | Loans to general government granted by monetary financial institutions (Millions of euro NSA)                 | 5 |
| 33 | Loans to monetary financial institutions granted by monetary financial institutions (Millions of euro NSA)    | 5 |
| 34 | Loans to other residents granted by monetary financial institutions (Millions of euro NSA)                    | 5 |
| 35 | Loans to total residents granted by monetary financial institutions (consolidated) (Millions of euro NSA)     | 5 |
| 36 | Overnight deposits (Millions of national currency NSA)                                                        | 5 |
| 37 | Discount Business Loans                                                                                       | 5 |
| 38 | Money market paper and debt securities up to 2 years (Millions of euro NSA)                                   | 5 |
| 39 | Money market funds shares/units (Millions of euro NSA)                                                        | 5 |

---

**External Sector Indices**

|    |                                                                                                                       |   |
|----|-----------------------------------------------------------------------------------------------------------------------|---|
| 40 | Quarterly Exports Of Goods And Services (Current Prices, Millions Of National Currency, Not Seasonally Adjusted Data) | 5 |
| 41 | Quarterly Exports Of Goods (Current Prices, Millions Of National Currency, Not Seasonally Adjusted Data)              | 5 |



|                      |                                                                                                                                            |   |
|----------------------|--------------------------------------------------------------------------------------------------------------------------------------------|---|
| 42                   | Quarterly Exports Of Services (Current Prices, Millions Of National Currency, Not Seasonally Adjusted Data)                                | 5 |
| 43                   | Imports of goods and services (Millions of national currency, chain-linked volumes, reference year 2000 SA)                                | 5 |
| 44                   | Quarterly Imports Of Goods (Current Prices, Millions Of National Currency At Prices Of The Previous Year, Not Seasonally Adjusted Data)    | 5 |
| 45                   | Quarterly Imports Of Services (Current Prices, Millions Of National Currency At Prices Of The Previous Year, Not Seasonally Adjusted Data) | 5 |
| 46                   | Net Current Account (Millions Of Euro, Quarterly)                                                                                          | 2 |
| 47                   | Real Effective Exchange Rate (deflator: consumer price indices - 41 trading partners)                                                      | 2 |
| <b>Miscellaneous</b> |                                                                                                                                            |   |
| 48                   | Consumer Confidence Index                                                                                                                  | 5 |
| 49                   | Gross capital formation (Millions of national currency SA)                                                                                 | 5 |
| 50                   | Household and NPISH final consumption expenditure (Millions of national currency NSA)                                                      | 5 |
| 51                   | Energy Supply: Total imports (Natural Gas) (Terajoules (Gross calorific value = GCV))                                                      | 5 |
| 52                   | 1-2 Year Government Bond Yield                                                                                                             | 2 |
| 53                   | Energy Supply: Primary production (Natural Gas) (Terajoules (Gross calorific value = GCV))                                                 | 5 |
| 54                   | Energy Supply: Stock change (Natural Gas) (Terajoules (Gross calorific value = GCV))                                                       | 2 |
| 55                   | Energy Supply: Gross inland consumption (Natural Gas) (Terajoules (Gross calorific value = GCV))                                           | 5 |
| 56                   | Gross consumption Electrical Energy                                                                                                        | 5 |

|    |                                |   |
|----|--------------------------------|---|
| 57 | 1-2 Year Government Bond Yield | 2 |
| 58 | Electric Utility Bond Yield    | 2 |
| 59 | 12-month Treasury Bill Yield   | 2 |
| 60 | 3-month T-Bill Yield           | 2 |
| 61 | 6-month Treasury Bill Yield    | 2 |
| 62 | Total Government Revenue       | 5 |
